# Supplementary material for: The extremely warm summer 2018 in Sweden – set in a historical context
Source: Copernicus journal article supplement (doi:10.5194/esd-2020-25), 2020-05-27
Supplement: Supplementary file 1 [file esd-2020-25-supplement.pdf]

## Supplement

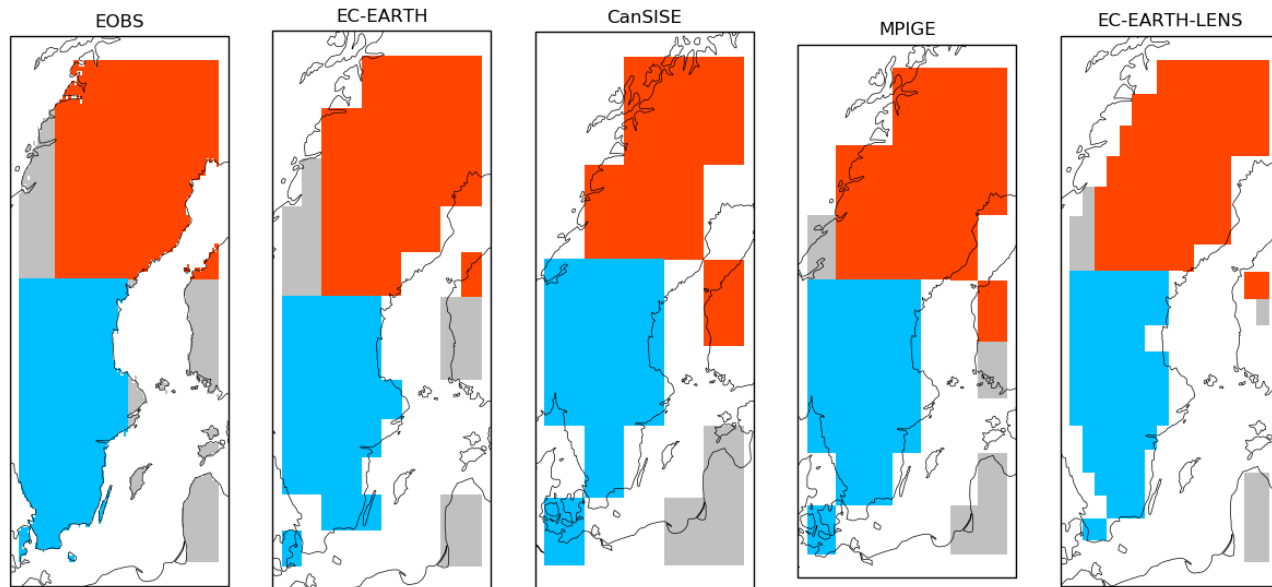

**Figure S1.** The maps show the land-sea mask of the models and illustrates how the distinction between northern (red) and southern (blue) Sweden has been made.

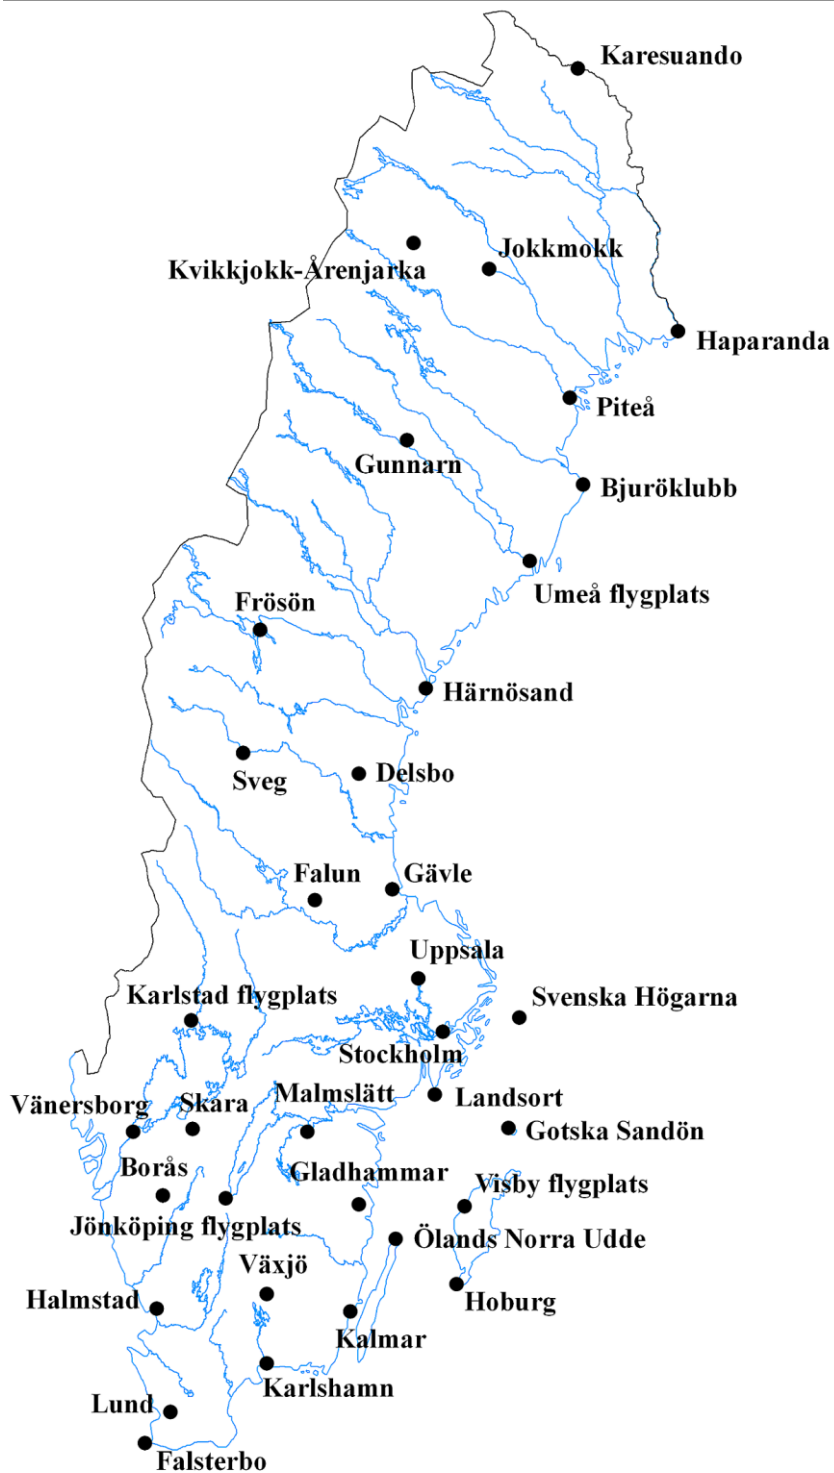

Figure S2. Observational stations operated in Sweden by SMHI used to calculate an average for the whole country.

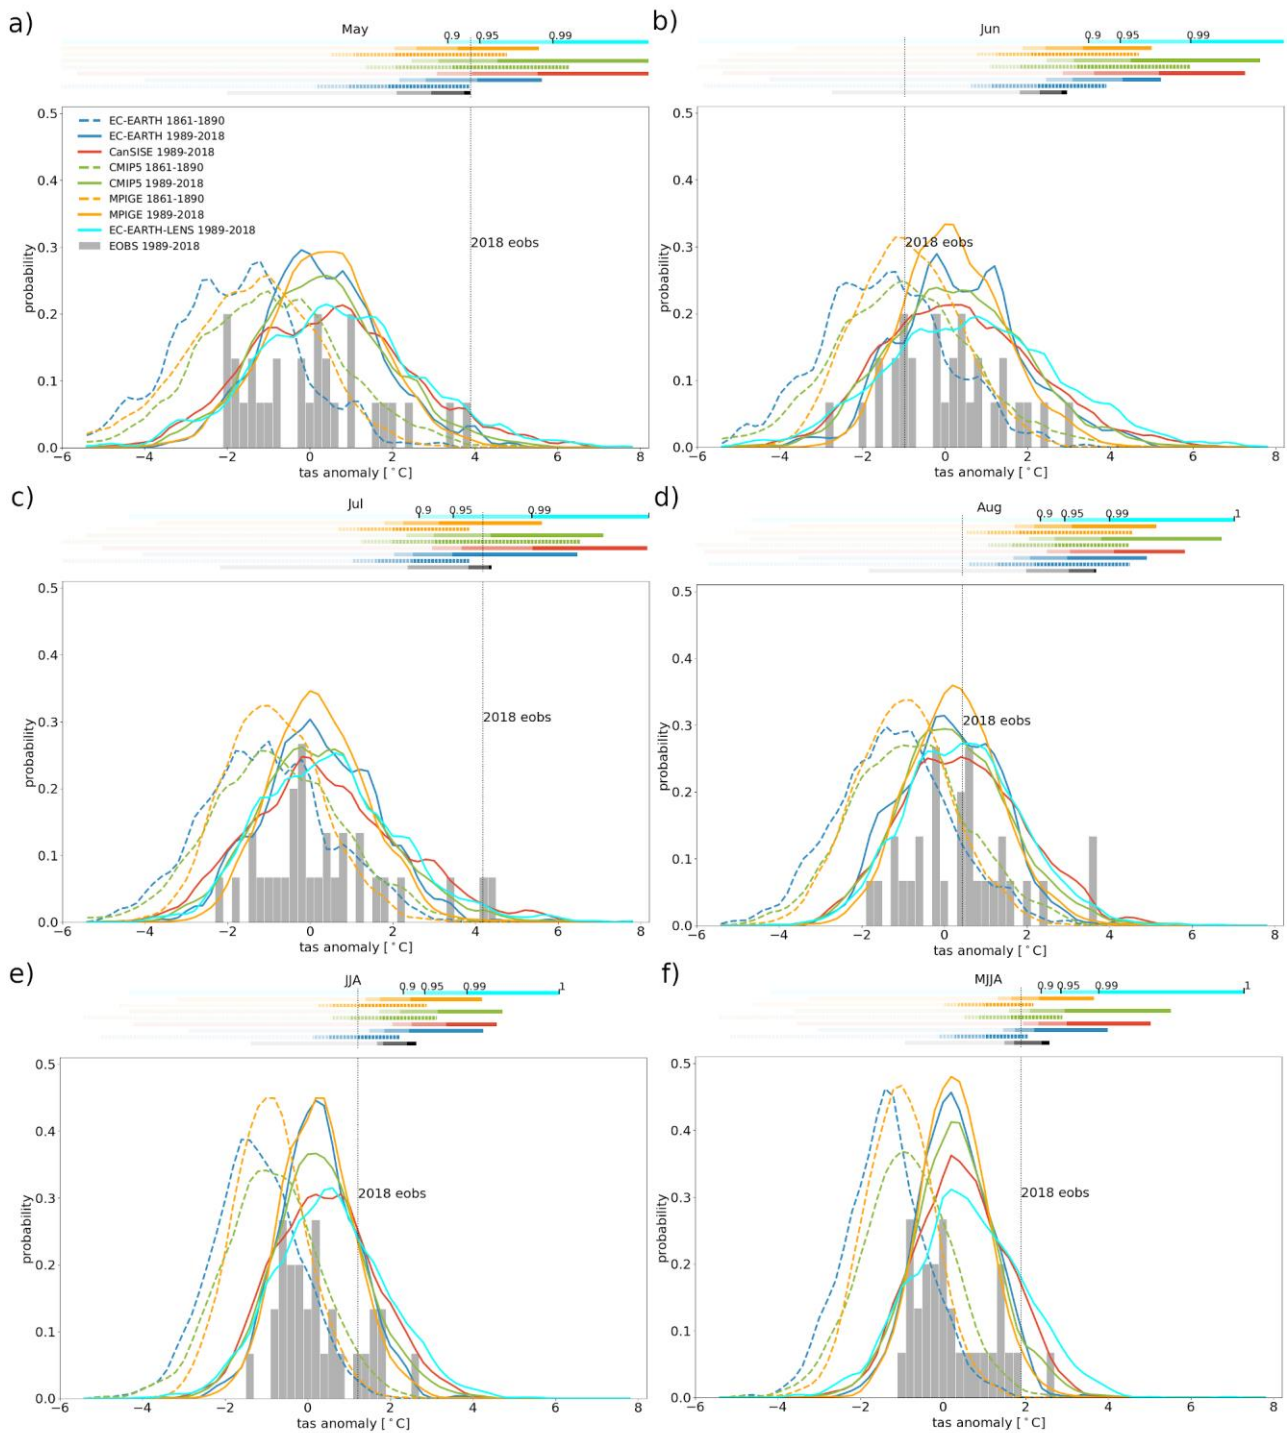

10 Figure S3. As in Figure 2 but for the Northern half of Sweden (as defined in Fig. S1 red).
